# Supplementary material for: Bioprinted Multi-Cell Type Lung Model for the Study of Viral Inhibitors
Source: MDPI journal article supplement (doi:10.3390/v13081590), 2021-08-11
Supplement: s1 [file s1]

# Supplement

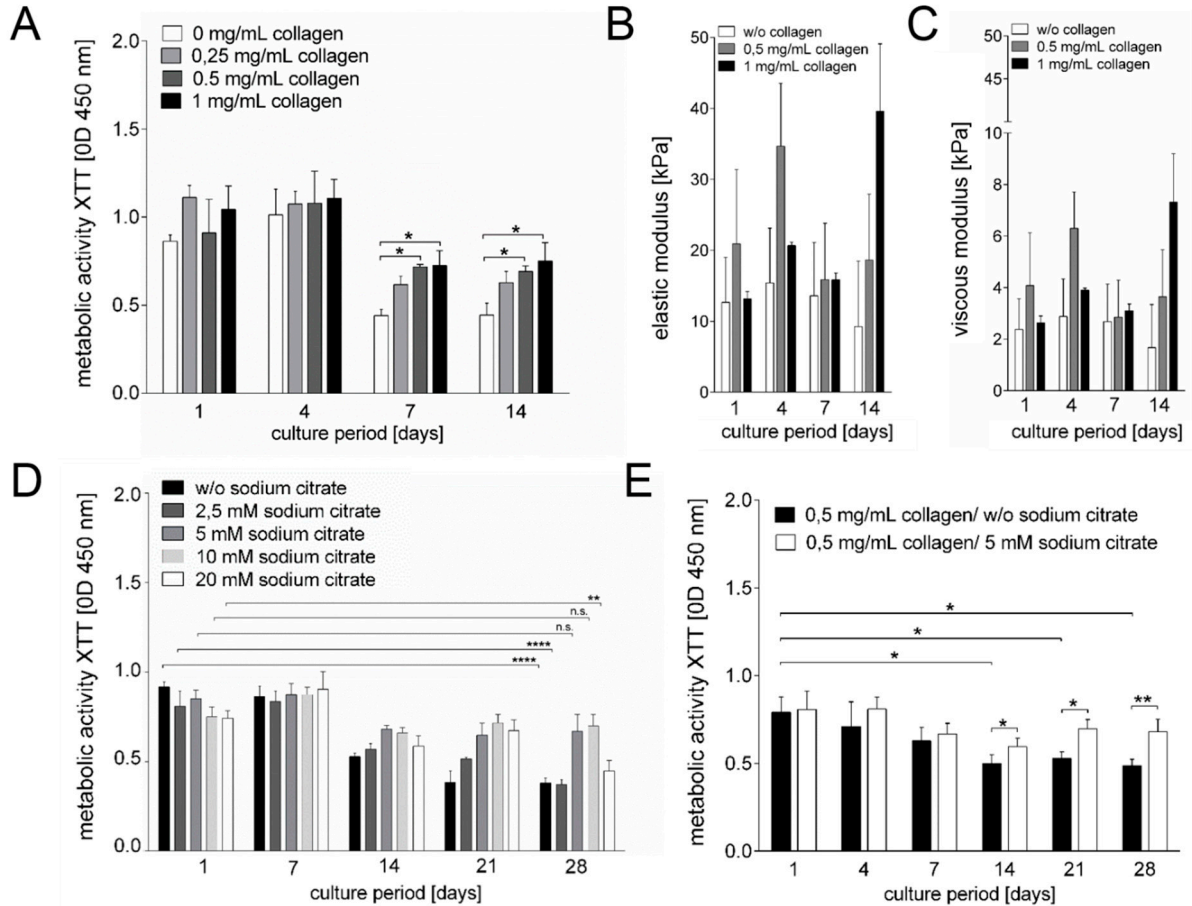

Figure S1. Optimization of bioink composition and culture media supplementation for 3D printed primary human normal lung fibroblast (NHLFb). (A) Metabolic activity of NHLFb printed in 3% alginate/ 3% gelatin bioinks with varying collagen I concentrations was determined by tetrazolium hydroxide salt (XTT) assays at the indicated time points post printing. (B and C) Rheological properties of printed alginate/gelatin constructs with varying collagen concentrations. (B) The elastic modulus of the wet bioink formulations was measured at a frequency of 1 Hz and 0.1% shear strain at 37°C at the indicated time points. (C) Shear modulus of printed constructs at increasing frequencies (0.1–10 Hz). (D; E) Metabolic activity of NHLFb printed in alginate/gelatin/0.5 mg/mL collagen bioink was determined following culture in media supplemented with different sodium citrate concentrations by XTT assay at indicated time points post printing. Results are shown as mean  $\pm$  SEM of three independent (A-D) experiments. Experiments to confirm the reproducibility of the results were carried out eight times (E). \*  $p \leq 0.05$ ; \*\*  $p \leq 0.01$ ; \*\*\*  $p \leq 0.001$ , \*\*\*\*  $p \leq 0.0001$ .
